# Supplementary material
Source: HighWire-hosted journal article supplement (https://bmjopen.bmj.com/content/11/7/e049257)
Supplement: inline-supplementary-material-4 [file inline-supplementary-material-4.pdf]

Appendix 4: Medication prescribing (antibiotic and antiviral), diagnostic testing, hospital referral and confidence with the treatment and advice, split for face-to-face (F2F, practice and home) consultations and phone/video (P/V) consultations, and specifically for COVID-19 suspected patients.

| Country                         | Antibiotic           | Antiviral          | Diagnostic testing   | Referral             | Confidence advice/treatment* |
|---------------------------------|----------------------|--------------------|----------------------|----------------------|------------------------------|
| <b>All countries</b>            |                      |                    |                      |                      |                              |
| <i>Patients (F2F)</i>           | 23.0%<br>(20.7-25.4) | 1.1%<br>(0.7-1.9)  | 39.8%<br>(37.1-42.6) | 10%<br>(8.5-11.8)    | 12.6% 60.6% 24.4% 2.0% 0.5%  |
| <i>COVID-19 suspected (F2F)</i> | 11.6%<br>(8.9-15.0)  | 0.7%<br>(0.2-2.0)  | 43.3%<br>(38.7-48.0) | 21.2%<br>(17.6-25.3) | 12.5% 52.3% 30.4% 3.4% 1.4%  |
| <i>Patients (P/V)</i>           | 13.9%<br>(12.4-15.6) | 1.3%<br>(0.9-2.0)  | 20.2%<br>(18.4-22.1) | 6.8%<br>(5.7-8.1)    | 9.0% 60.0% 27.9% 2.9% 0.2%   |
| <i>COVID-19 suspected (P/V)</i> | 8.2%<br>(6.5-10.2)   | 0.81%<br>(0.4-1.7) | 31.2%<br>(28.2-34.3) | 12.7%<br>(10.6-15.0) | 8.0% 56.0% 31.4% 4.3% 0.4%   |
| <b>Armenia</b>                  |                      |                    |                      |                      |                              |
| <i>Patients (F2F)</i>           | 7.8%<br>(4.5-13.2)   | 0.0%<br>(0.0-2.4)  | 38.6%<br>(31.2-46.5) | 12.4%<br>(8.1-18.6)  | 25.5% 41.8% 28.8% 3.9% 0.0%  |
| <i>Patients (P/V)</i>           | 23.5%<br>(9.6-47.3)  | 0.0%<br>(0.0-18.4) | 41.2%<br>(21.6-64.0) | 17.6%<br>(6.2-41.0)  | 11.8% 35.3% 29.4% 23.5% 0.0% |
| <b>Belgium</b>                  |                      |                    |                      |                      |                              |
| <i>Patients (F2F)</i>           | 5.4%<br>(1.8-14.6)   | 0.0%<br>(0.0-6.4)  | 1.8%<br>(0.3-9.4)    | 26.8%<br>(17.0-39.6) | 1.9% 11.3% 64.2% 11.3% 11.3% |
| <i>Patients (P/V)</i>           | 2.5%<br>(1.0-6.3)    | 0.0%<br>(0.02.4-)  | 0.0%<br>(0.0-2.4)    | 1.9%<br>(0.6-5.4)    | 3.2% 43.0% 49.4% 3.8% 0.6%   |
| <b>Germany</b>                  |                      |                    |                      |                      |                              |
| <i>Patients (F2F)</i>           | 8.6%<br>(5.1-14.2)   | 0.0%<br>(0.0-2.5)  | 37.1%<br>(29.8-45)   | 0.7%<br>(0.1-3.7)    | 1.3% 58.3% 39.7% 0.7% 0.0%   |
| <i>Patients (P/V)</i>           | 0.0%<br>(0.0-9.2)    | 0.0%<br>(0.0-9.2)  | 42.1%<br>(27.9-57.8) | 0.0%<br>(0.0-9.2)    | 0.0% 57.9% 42.1% 0.0% 0.0%   |

|                       |                      |                    |                      |                      |                             |
|-----------------------|----------------------|--------------------|----------------------|----------------------|-----------------------------|
| <b>Denmark</b>        |                      |                    |                      |                      |                             |
| <i>Patients (F2F)</i> | 7.7%<br>(1.4-33.3)   | 0.0%<br>(0.0-22.8) | 92.3%<br>(66.7-98.6) | 7.7%<br>(1.4-33.3)   | 0.0% 40.0% 40.0% 20.0% 0.0% |
| <i>Patients (P/V)</i> | 4.5%<br>(2.1-9.5)    | 0.0%<br>(0.0-2.8)  | 60.2%<br>(51.7-68.1) | 18.0%<br>(12.4-25.4) | 4.5% 32.1% 43.8% 18.8% 0.9% |
| <b>Spain</b>          |                      |                    |                      |                      |                             |
| <i>Patients (F2F)</i> | 4.8%<br>(2.1-10.8)   | 0.0%<br>(0.0-3.6)  | 51.9%<br>(42.4-61.3) | 15.4%<br>(9.7-23.5)  | 9.2% 73.5% 16.3% 1.0% 0.0%  |
| <i>Patients (P/V)</i> | 4.2%<br>(1.8-9.5)    | 0.0%<br>(0.0-3.1)  | 21.8%<br>(15.4-30.1) | 6.7%<br>(3.4-12.7)   | 9.3% 74.6% 16.1% 0.0% 0.0%  |
| <b>France</b>         |                      |                    |                      |                      |                             |
| <i>Patients (F2F)</i> | 17.8%<br>(10.7-28.1) | 0.0%<br>(0.0-5.0)  | 43.8%<br>(33.0-55.2) | 6.8%<br>(3.0-15.1)   | 9.9% 63.4% 21.1% 5.6% 0.0%  |
| <i>Patients (P/V)</i> | 9.8%<br>(5.0-18.1)   | 0.0%<br>(0.0-4.5)  | 15.9%<br>(9.5-25.3)  | 4.9%<br>(1.9-11.9)   | 11.0% 37.8% 47.6% 1.2% 2.4% |
| <b>Georgia</b>        |                      |                    |                      |                      |                             |
| <i>Patients (F2F)</i> | 9.9%<br>(6.0-15.9)   | 2.1%<br>(0.7-6.0)  | 50.7%<br>(42.6-58.8) | 2.1%<br>(0.7-6.0)    | 8.5% 88.0% 3.5% 0.0% 0.0%   |
| <i>Patients (P/V)</i> | 1.3%<br>(0.2-6.7)    | 6.3%<br>(2.7-13.8) | 8.8%<br>(4.3-17.0)   | 1.3%<br>(0.2-6.7)    | 8.8% 81.3% 10.0% 0.0% 0.0%  |
| <b>Greece</b>         |                      |                    |                      |                      |                             |
| <i>Patients (F2F)</i> | 41.2%<br>(32.0-51.2) | 7.2%<br>(3.5-14.2) | 49.5%<br>(39.7-59.3) | 26.8%<br>(19.0-36.4) | 6.2% 71.1% 22.7% 0.0% 0.0%  |
| <i>Patients (P/V)</i> | 23.4%<br>(16.8-31.6) | 4.8%<br>(2.2-10.2) | 5.6%<br>(2.8-11.2)   | 5.6%<br>(2.8-11.2)   | 8.9% 67.7% 23.4% 0.0% 0.0%  |

|                       |                      |                   |                      |                      |                             |
|-----------------------|----------------------|-------------------|----------------------|----------------------|-----------------------------|
| <b>Hungary</b>        |                      |                   |                      |                      |                             |
| <i>Patients (F2F)</i> | 57.1%<br>(42.2-70.9) | 0.0%<br>(0.0-8.4) | 33.3%<br>(21.0-48.4) | 2.4%<br>(0.4-12.3)   | 26.2% 73.8% 0.0% 0.0% 0.0%  |
| <i>Patients (P/V)</i> | 28.1%<br>(20.1-37.8) | 0.0%<br>(0.0-3.8) | 13.5%<br>(8.1-21.8)  | 1.0%<br>(0.2-5.7)    | 11.5% 87.5% 1.0% 0.0% 0.0%  |
| <b>Ireland</b>        |                      |                   |                      |                      |                             |
| <i>Patients (F2F)</i> | 29.7%<br>(17.5-45.8) | 0.0%<br>(0.0-9.4) | 16.2%<br>(7.7-31.1)  | 10.8%<br>(4.3-24.7)  | 25.7% 48.6% 25.7% 0.0% 0.0% |
| <i>Patients (P/V)</i> | 21.2%<br>(15.9-27.8) | 0.0%<br>(0.0-2.1) | 7.8%<br>(4.7-12.7)   | 0.6%<br>(0.1-3.1)    | 10.7% 59.3% 28.2% 1.7% 0.0% |
| <b>Moldova</b>        |                      |                   |                      |                      |                             |
| <i>Patients (F2F)</i> | 28.3%<br>(18.5-40.8) | 1.7%<br>(0.3-8.9) | 80.0%<br>(68.2-88.2) | 8.3%<br>(3.6-18.1)   | 43.3% 50.0% 6.7% 0.0% 0.0%  |
| <i>Patients (P/V)</i> | 5.1%<br>(2.7-9.3)    | 2.2%<br>(0.9-5.6) | 61.8%<br>(54.5-68.6) | 20.2%<br>(15.0-26.7) | 2.8% 71.9% 24.7% 0.6% 0.0%  |
| <b>Netherlands</b>    |                      |                   |                      |                      |                             |
| <i>Patients (F2F)</i> | 32.2%<br>(21.7-44.9) | 0.0%<br>(0.0-6.1) | 30.5%<br>(20.3-43.0) | 11.9%<br>(5.9-22.5)  | 8.8% 56.1% 31.6% 3.5% 0.0%  |
| <i>Patients (P/V)</i> | 7.1%<br>(4.1-11.9)   | 0.0%<br>(0.0-2.2) | 2.4%<br>(0.9-5.9)    | 3.5%<br>(1.6-7.5)    | 5.0% 61.5% 28.0% 5.6% 0.0%  |
| <b>Poland</b>         |                      |                   |                      |                      |                             |
| <i>Patients (F2F)</i> | 39.6%<br>(30.1-49.8) | 0.0%<br>(0.0-4.1) | 15.4%<br>(9.4-24.2)  | 5.5%<br>(2.4-12.2)   | 5.5% 71.4% 22.0% 1.1% 0.0%  |
| <i>Patients (P/V)</i> | 21.6%<br>(15.6-29.1) | 2.9%<br>(1.1-7.2) | 11.5%<br>(7.2-17.9)  | 2.2%<br>(0.7-6.2)    | 6.5% 57.6% 32.4% 3.6% 0.0%  |

|                       |                      |                    |                      |                     |                             |
|-----------------------|----------------------|--------------------|----------------------|---------------------|-----------------------------|
| <b>Romania</b>        |                      |                    |                      |                     |                             |
| <i>Patients (F2F)</i> | 25.8%<br>(13.7-43.2) | 3.2%<br>(0.6-16.2) | 19.4%<br>(9.2-36.3)  | 6.5%<br>(1.8-20.7)  | 35.5% 58.1% 6.5% 0.0% 0.0%  |
| <i>Patients (P/V)</i> | 16.9%<br>(10.3-26.3) | 4.8%<br>(1.9-11.7) | 21.7%<br>(14.2-31.7) | 8.4%<br>(4.1-16.4)  | 39.8% 53.0% 7.2% 0.0% 0.0%  |
| <b>Ukraine</b>        |                      |                    |                      |                     |                             |
| <i>Patients (F2F)</i> | 50.5%<br>(41.1-59.8) | 1.9%<br>(0.5-6.6)  | 45.8%<br>(36.7-55.2) | 7.5%<br>(3.8-14.1)  | 2.8% 55.7% 40.6% 0.9% 0.0%  |
| <i>Patients (P/V)</i> | 19.8%<br>(13.7-27.8) | 0.8%<br>(0.1-4.5)  | 18.2%<br>(12.3-26.0) | 11.6%<br>(7.0-18.5) | 14.2% 62.5% 23.3% 0.0% 0.0% |
| <b>United Kingdom</b> |                      |                    |                      |                     |                             |
| <i>Patients (F2F)</i> | 55.2%<br>(37.5-71.6) | 0.0%<br>(0.0-11.7) | 20.7%<br>(9.8-38.4)  | 20.7%<br>(9.8-38.4) | 27.6% 62.1% 10.3% 0.0% 0.0% |
| <i>Patients (P/V)</i> | 46.5%<br>(36.7-56.9) | 0.0%<br>(0.0-4.1)  | 13.3%<br>(7.8-21.9)  | 5.6%<br>(2.4-12.4)  | 9.0% 53.9% 36.0% 1.1% 0.0%  |

\* very confident, confident, moderately, unconfident, very unconfident.
