# Supplementary material
Source: HighWire-hosted journal article supplement (https://bmjopen.bmj.com/content/11/7/e049257)
Supplement: inline-supplementary-material-5 [file inline-supplementary-material-5.pdf]

## Appendix 5: All advice provided to patients during all registered contacts, and separately for patients suspected of COVID-19.

|                                           |                                         |                                 |                       |  |
|-------------------------------------------|-----------------------------------------|---------------------------------|-----------------------|--|
| <b>All countries</b>                      | <b>Advice for home isolation</b>        |                                 |                       |  |
|                                           | <i>All patients</i>                     | 67.2% (65.5-68.8)               |                       |  |
|                                           | <i>COVID-19 suspected</i>               | 83.2% (81.1-85.1)               |                       |  |
|                                           | <b>Advice for symptomatic treatment</b> |                                 |                       |  |
|                                           | <i>All patients</i>                     | 75.6% (74-77)                   |                       |  |
|                                           | <i>COVID-19 suspected</i>               | 70.4% (67.9-72.8)               |                       |  |
|                                           | <b>A scheduled follow-up visit/call</b> |                                 |                       |  |
|                                           | <i>All patients</i>                     | 49.9% (48.1-51.6)               |                       |  |
|                                           | <i>COVID-19 suspected</i>               | 51.5% (48.8-54.2)               |                       |  |
|                                           | <b>Advice for family members</b>        |                                 | <b>Home isolation</b> |  |
| <i>All patients</i>                       | 51.9%<br>(50.1-53.7)                    | <i>All patients</i>             | 34.0% (32.3-35.7)     |  |
| <i>COVID-19 suspected</i>                 | 69.6%<br>(67.1-72.1)                    | <i>COVID-19 suspected</i>       | 54.7% (52-57.4)       |  |
|                                           |                                         | <b>Social distancing</b>        |                       |  |
|                                           |                                         | <i>All patients</i>             | 40.2% (38.5-41.9)     |  |
|                                           |                                         | <i>COVID-19 suspected</i>       | 53.1% (52-57.4)       |  |
| <b>Preventive measures for patient</b>    |                                         | <b>Extra handwashing</b>        |                       |  |
| <i>All patients</i>                       | 64.1%<br>(62.4-65.8)                    | <i>All patients</i>             | 56.7% (55-58.5)       |  |
| <i>COVID-19 suspected</i>                 | 68.6%<br>(66.1-71.1)                    | <i>COVID-19 suspected</i>       | 62.4% (59.8-65)       |  |
|                                           |                                         | <b>Sneezing in sleeve</b>       |                       |  |
|                                           |                                         | <i>All patients</i>             | 47.2% (45.5-49)       |  |
|                                           |                                         | <i>COVID-19 suspected</i>       | 48.4% (45.7-51.1)     |  |
|                                           |                                         | <b>Social distancing</b>        |                       |  |
|                                           |                                         | <i>All patients</i>             | 51.1% (49.3-52.9)     |  |
|                                           |                                         | <i>COVID-19 suspected</i>       | 56.3% (53.6-59)       |  |
|                                           |                                         | <b>Nose/mouth protection</b>    |                       |  |
|                                           |                                         | <i>All patients</i>             | 37.3% (35.6-39)       |  |
|                                           |                                         | <i>COVID-19 suspected</i>       | 42.2% (39.5-44.9)     |  |
|                                           |                                         | <b>Staying in separate room</b> |                       |  |
|                                           |                                         | <i>All patients</i>             | 27.3% (25.8-28.9)     |  |
|                                           |                                         | <i>COVID-19 suspected</i>       | 40.6% (37.9-43.3)     |  |
| <b>Where to find reliable information</b> |                                         |                                 |                       |  |
| <i>All patients</i>                       | 20.0% (18.6-21.5)                       |                                 |                       |  |
| <i>COVID-19 suspected</i>                 | 28.0% (25.6-30.5)                       |                                 |                       |  |
| <b>Armenia</b>                            | <b>Advice for home isolation</b>        |                                 |                       |  |
|                                           | <i>All patients</i>                     | 47.6% (40.3-55.1)               |                       |  |
|                                           | <i>COVID-19 suspected</i>               | 64.9% (25.6-30.5)               |                       |  |
|                                           | <b>Advice for symptomatic treatment</b> |                                 |                       |  |
|                                           | <i>All patients</i>                     | 81.2% (74.6-86.3)               |                       |  |
|                                           | <i>COVID-19 suspected</i>               | 83.3% (75.4-89.1)               |                       |  |
|                                           | <b>A scheduled follow-up visit/call</b> |                                 |                       |  |
|                                           | <i>All patients</i>                     | 49.4% (42-56.8)                 |                       |  |
|                                           | <i>COVID-19 suspected</i>               | 46.5% (37.6-55.6)               |                       |  |
|                                           | <b>Advice for family members</b>        |                                 | <b>Home isolation</b> |  |
| <i>All patients</i>                       | 47.6%<br>(40.3-55.1)                    | <i>All patients</i>             | 44.1% (36.9-51.6)     |  |
| <i>COVID-19 suspected</i>                 | 62.3%<br>(53.1-70.6)                    | <i>COVID-19 suspected</i>       | 58.8% (49.6-67.4)     |  |
|                                           |                                         | <b>Social distancing</b>        |                       |  |
|                                           |                                         | <i>All patients</i>             | 9.4% (5.9-14.7)       |  |
|                                           |                                         | <i>COVID-19 suspected</i>       | 11.4% (6.8-18.5)      |  |

|                |                                                                  |                                                        |                                                     |                                                  |                   |
|----------------|------------------------------------------------------------------|--------------------------------------------------------|-----------------------------------------------------|--------------------------------------------------|-------------------|
|                | <b>Preventive measures for patient</b><br><i>All patients</i>    | 44.1%<br>(36.9-51.6)                                   | <b>Extra handwashing</b><br><i>All patients</i>     | 42.4% (35.2-49.9)                                |                   |
|                | <i>COVID-19 suspected</i>                                        | 55.3%<br>(46.1-64.1)                                   | <i>COVID-19 suspected</i>                           | 53.5% (44.462.4)                                 |                   |
|                |                                                                  |                                                        | <b>Sneezing in sleeve</b><br><i>All patients</i>    | 5.9% (3.2-10.5)                                  |                   |
|                |                                                                  |                                                        | <i>COVID-19 suspected</i>                           | 7.0% (3.6-13.2)                                  |                   |
|                |                                                                  |                                                        | <b>Social distancing</b><br><i>All patients</i>     | 6.5% (3.7-11.2)                                  |                   |
|                |                                                                  |                                                        | <i>COVID-19 suspected</i>                           | 7.0% (3.6-13.2)                                  |                   |
|                |                                                                  |                                                        | <b>Nose/mouth protection</b><br><i>All patients</i> | 5.9% (3.2-10.5)                                  |                   |
|                |                                                                  | <i>COVID-19 suspected</i>                              | 7.9% (4.2-14.3)                                     |                                                  |                   |
|                |                                                                  | <b>Staying in separate room</b><br><i>All patients</i> | 2.9% (1.3-6.7)                                      |                                                  |                   |
|                |                                                                  | <i>COVID-19 suspected</i>                              | 4.4% (1.9-9.9)                                      |                                                  |                   |
|                | <b>Where to find reliable information</b><br><i>All patients</i> | 2.4% (1-5.9)                                           |                                                     |                                                  |                   |
|                | <i>COVID-19 suspected</i>                                        | 1.8% (0.5-6.2)                                         |                                                     |                                                  |                   |
| <b>Belgium</b> | <b>Advice for home isolation</b><br><i>All patients</i>          | 90.7% (86.1-93.9)                                      |                                                     |                                                  |                   |
|                | <i>COVID-19 suspected</i>                                        | 89.0% (82.9-93.1)                                      |                                                     |                                                  |                   |
|                | <b>Advice for symptomatic treatment</b><br><i>All patients</i>   | 71.3% (64.9-76.9)                                      |                                                     |                                                  |                   |
|                | <i>COVID-19 suspected</i>                                        | 69.2% (61.3-76.1)                                      |                                                     |                                                  |                   |
|                | <b>A scheduled follow-up visit/call</b><br><i>All patients</i>   | 30.1% (24.4-36.5)                                      |                                                     |                                                  |                   |
|                | <i>COVID-19 suspected</i>                                        | 34.9% (27.7-43)                                        |                                                     |                                                  |                   |
|                | <b>Advice for family members</b><br><i>All patients</i>          | 50.0%<br>(43.3-56.6)                                   | <b>Home isolation</b><br><i>All patients</i>        | 22.2% (17.2-28.2)                                |                   |
|                |                                                                  |                                                        | <i>COVID-19 suspected</i>                           | 18.5% (13-25.6)                                  |                   |
|                | <i>COVID-19 suspected</i>                                        | 50.7%<br>(42.7-58.7)                                   | <b>Social distancing</b><br><i>All patients</i>     | 42.1% (35.7-48.8)                                |                   |
|                |                                                                  |                                                        | <i>COVID-19 suspected</i>                           | 42.5% (34.7-50.6)                                |                   |
|                | <b>Preventive measures for patient</b><br><i>All patients</i>    | 31.5%<br>(25.7-38)                                     | <b>Extra handwashing</b><br><i>All patients</i>     | 23.6% (18.4-29.7)                                |                   |
|                |                                                                  |                                                        | <i>COVID-19 suspected</i>                           | 19.9% (14.2-27.1)                                |                   |
|                |                                                                  | <i>COVID-19 suspected</i>                              | 26.7%<br>(20.2-34.4)                                | <b>Sneezing in sleeve</b><br><i>All patients</i> | 18.1% (13.5-23.7) |
|                |                                                                  |                                                        |                                                     | <i>COVID-19 suspected</i>                        | 13.7% (9.1-20.2)  |
|                |                                                                  |                                                        | <b>Social distancing</b><br><i>All patients</i>     | 30.6% (24.8-37)                                  |                   |
|                |                                                                  |                                                        | <i>COVID-19 suspected</i>                           | 25.3% (19-33)                                    |                   |
|                |                                                                  |                                                        | <b>Nose/mouth protection</b><br><i>All patients</i> | 6.0% (3.6-10)                                    |                   |
|                |                                                                  | <i>COVID-19 suspected</i>                              | 5.5% (2.8-10.4)                                     |                                                  |                   |
|                |                                                                  | <b>Staying in separate room</b><br><i>All patients</i> | 12.5% (8.7-17.6)                                    |                                                  |                   |
|                |                                                                  | <i>COVID-19 suspected</i>                              | 11.0% (6.9-17.1)                                    |                                                  |                   |
|                | <b>Where to find reliable information</b><br><i>All patients</i> | 15.3% (11.1-20.7)                                      |                                                     |                                                  |                   |
|                | <i>COVID-19 suspected</i>                                        | 14.4% (9.6-20.1)                                       |                                                     |                                                  |                   |

|                                           |                                         |                                 |                           |                   |
|-------------------------------------------|-----------------------------------------|---------------------------------|---------------------------|-------------------|
| <b>Germany</b>                            | <b>Advice for home isolation</b>        |                                 |                           |                   |
|                                           | <i>All patients</i>                     |                                 | 19.6% (14.6-25.8)         |                   |
|                                           | <i>COVID-19 suspected</i>               |                                 | 88.2% (73.4-95.3)         |                   |
|                                           | <b>Advice for symptomatic treatment</b> |                                 |                           |                   |
|                                           | <i>All patients</i>                     |                                 | 96.3% (92.6-98.2)         |                   |
|                                           | <i>COVID-19 suspected</i>               |                                 | 100% (89.9-100)           |                   |
|                                           | <b>A scheduled follow-up visit/call</b> |                                 |                           |                   |
|                                           | <i>All patients</i>                     |                                 | 91.0% (86.1-94.3)         |                   |
|                                           | <i>COVID-19 suspected</i>               |                                 | 94.1% (80.9-98.4)         |                   |
|                                           | <b>Advice for family members</b>        |                                 |                           |                   |
| <i>All patients</i>                       | 9.5%<br>(6.1-14.6)                      | <b>Home isolation</b>           | <i>All patients</i>       | 6.3% (3.7-10.8)   |
| <i>COVID-19 suspected</i>                 | 52.9%<br>(36.7-68.6)                    | <i>COVID-19 suspected</i>       | <i>COVID-19 suspected</i> | 35.3% (21.5-52.1) |
|                                           |                                         | <b>Social distancing</b>        | <i>All patients</i>       | 7.4% (4.5-12.1)   |
|                                           |                                         | <i>COVID-19 suspected</i>       | <i>COVID-19 suspected</i> | 41.2% (26.4-57.8) |
| <b>Preventive measures for patient</b>    |                                         | <b>Extra handwashing</b>        | <i>All patients</i>       | 39.7% (33-46.8)   |
| <i>All patients</i>                       | 48.7%<br>(41.7-55.8)                    | <i>COVID-19 suspected</i>       | <i>COVID-19 suspected</i> | 97.1% (85.1-99.5) |
| <i>COVID-19 suspected</i>                 | 97.1%<br>(85.1-99.5)                    | <b>Sneezing in sleeve</b>       | <i>All patients</i>       | 40.2% (33.5-47.3) |
|                                           |                                         | <i>COVID-19 suspected</i>       | <i>COVID-19 suspected</i> | 91.2% (77-97)     |
|                                           |                                         | <b>Social distancing</b>        | <i>All patients</i>       | 37.0% (30.5-44.1) |
|                                           |                                         | <i>COVID-19 suspected</i>       | <i>COVID-19 suspected</i> | 94.1% (80.9-98.4) |
|                                           |                                         | <b>Nose/mouth protection</b>    | <i>All patients</i>       | 22.8% (17.4-29.2) |
|                                           |                                         | <i>COVID-19 suspected</i>       | <i>COVID-19 suspected</i> | 85.3% (70-93.6)   |
|                                           |                                         | <b>Staying in separate room</b> | <i>All patients</i>       | 0.0% (0-2)        |
|                                           |                                         | <i>COVID-19 suspected</i>       | <i>COVID-19 suspected</i> | 0.0% (0-10)       |
| <b>Where to find reliable information</b> |                                         |                                 |                           |                   |
| <i>All patients</i>                       |                                         |                                 |                           | 10.6% (7-15.8)    |
| <i>COVID-19 suspected</i>                 |                                         |                                 |                           | 58.8% (42.2-73.6) |
| <b>Denmark</b>                            | <b>Advice for home isolation</b>        |                                 |                           |                   |
|                                           | <i>All patients</i>                     |                                 | 88.2% (82.1-92.4)         |                   |
|                                           | <i>COVID-19 suspected</i>               |                                 | 92.7% (86.3-96.3)         |                   |
|                                           | <b>Advice for symptomatic treatment</b> |                                 |                           |                   |
|                                           | <i>All patients</i>                     |                                 | 46.1% (38.3-54)           |                   |
|                                           | <i>COVID-19 suspected</i>               |                                 | 44.5% (35.6-53.9)         |                   |
|                                           | <b>A scheduled follow-up visit/call</b> |                                 |                           |                   |
|                                           | <i>All patients</i>                     |                                 | 18.4% (13.1-25.3)         |                   |
|                                           | <i>COVID-19 suspected</i>               |                                 | 17.3% (11.4-25.4)         |                   |
|                                           | <b>Advice for family members</b>        |                                 |                           |                   |
| <i>All patients</i>                       | 24.3%<br>(18.2-31.7)                    | <b>Home isolation</b>           | <i>All patients</i>       | 13.8% (9.2-20.2)  |
| <i>COVID-19 suspected</i>                 | 23.6%<br>(16.7-32.4)                    | <i>COVID-19 suspected</i>       | <i>COVID-19 suspected</i> | 14.5% (9.2-22.3)  |
|                                           |                                         | <b>Social distancing</b>        | <i>All patients</i>       | 13.8% (9.2-20.2)  |
|                                           |                                         | <i>COVID-19 suspected</i>       | <i>COVID-19 suspected</i> | 10.9% (6.4-8.1)   |
| <b>Preventive measures for patient</b>    |                                         | <b>Extra handwashing</b>        | <i>All patients</i>       | 21.7% (15.9-28.9) |
| <i>All patients</i>                       | 37.5%<br>(30.2-45.4)                    | <i>COVID-19 suspected</i>       | <i>COVID-19 suspected</i> | 19.1% (12.8-27.4) |

|  |                                                                                               |                                    |                                                                                     |                                        |
|--|-----------------------------------------------------------------------------------------------|------------------------------------|-------------------------------------------------------------------------------------|----------------------------------------|
|  | <i>COVID-19 suspected</i>                                                                     | 35.5%<br>(27.1-44.8)               | <b>Sneezing in sleeve</b><br><i>All patients</i><br><i>COVID-19 suspected</i>       | 18.4% (13.1-25.4)<br>18.2% (12.1-26.4) |
|  |                                                                                               |                                    | <b>Social distancing</b><br><i>All patients</i><br><i>COVID-19 suspected</i>        | 23.0% (17.1-30.3)<br>20.9% (14.4-29.4) |
|  |                                                                                               |                                    | <b>Nose/mouth protection</b><br><i>All patients</i><br><i>COVID-19 suspected</i>    | 2.0% (0.7-5.6)<br>2.7% (0.9-7.7)       |
|  |                                                                                               |                                    | <b>Staying in separate room</b><br><i>All patients</i><br><i>COVID-19 suspected</i> | 0.7% (0.1-3.6)<br>0.9% (0.2-4.9)       |
|  | <b>Where to find reliable information</b><br><i>All patients</i><br><i>COVID-19 suspected</i> | 7.9% (4.6-13.3)<br>7.3% (3.7-13.7) |                                                                                     |                                        |

|              |                                                                                                 |                                                |                                                                                     |                                        |
|--------------|-------------------------------------------------------------------------------------------------|------------------------------------------------|-------------------------------------------------------------------------------------|----------------------------------------|
| <b>Spain</b> | <b>Advice for home isolation</b><br><i>All patients</i><br><i>COVID-19 suspected</i>            | 81.2% (75.5-85.8)<br>89.4% (84.1-93)           |                                                                                     |                                        |
|              | <b>Advice for symptomatic treatment</b><br><i>All patients</i><br><i>COVID-19 suspected</i>     | 84.8% (79.5-88.9)<br>84.0% (78.1-88.6)         |                                                                                     |                                        |
|              | <b>A scheduled follow-up visit/call</b><br><i>All patients</i><br><i>COVID-19 suspected</i>     | 74.4% (68.3-79.7)<br>81.9% (75.8-86.8)         |                                                                                     |                                        |
|              | <b>Advice for family members</b><br><i>PPAS COVID</i><br><br><i>COVID-19 suspected patients</i> | 69.5%<br>(63.2-75.2)<br><br>78.7%<br>(72.3-84) | <b>Home isolation</b><br><i>All patients</i><br><i>COVID-19 suspected</i>           | 65.5% (59-71.4)<br>73.9% (67.2-79.7)   |
|              |                                                                                                 |                                                | <b>Social distancing</b><br><i>All patients</i><br><i>COVID-19 suspected</i>        | 51.1% (44.6-57.6)<br>57.4% (50.3-64.3) |
|              | <b>Preventive measures for patient</b><br><i>All patients</i><br><br><i>COVID-19 suspected</i>  | 80.7%<br>(75-85.4)<br><br>87.2%<br>(81.7-91.3) | <b>Extra handwashing</b><br><i>All patients</i><br><i>COVID-19 suspected</i>        | 78.0% (72.1-83)<br>84.0% (78.1-88.6)   |
|              |                                                                                                 |                                                | <b>Sneezing in sleeve</b><br><i>All patients</i><br><i>COVID-19 suspected</i>       | 39.5% (33.3-46)<br>43.1% (36.2-50.2)   |
|              |                                                                                                 |                                                | <b>Social distancing</b><br><i>All patients</i><br><i>COVID-19 suspected</i>        | 58.3% (51.7-64.6)<br>63.8% (56.8-70.4) |
|              |                                                                                                 |                                                | <b>Nose/mouth protection</b><br><i>All patients</i><br><i>COVID-19 suspected</i>    | 56.5% (50-62.8)<br>60.6% (53.5-67.3)   |
|              |                                                                                                 |                                                | <b>Staying in separate room</b><br><i>All patients</i><br><i>COVID-19 suspected</i> | 62.3% (55.8-68.4)<br>70.2% (63.3-76.3) |
|              | <b>Where to find reliable information</b><br><i>All patients</i><br><i>COVID-19 suspected</i>   | 20.6% (15.8-26.4)<br>23.9% (18.4-30.5)         |                                                                                     |                                        |

|                                           |                                         |             |                                 |       |
|-------------------------------------------|-----------------------------------------|-------------|---------------------------------|-------|
| <b>France</b>                             | <b>Advice for home isolation</b>        |             |                                 |       |
|                                           | <i>All patients</i>                     | 79.4%       | (72.3-85)                       |       |
|                                           | <i>COVID-19 suspected</i>               | 89.4%       | (81.5-94.1)                     |       |
|                                           | <b>Advice for symptomatic treatment</b> |             |                                 |       |
|                                           | <i>All patients</i>                     | 80.0%       | (73-85.5)                       |       |
|                                           | <i>COVID-19 suspected</i>               | 81.9%       | (72.9-88.4)                     |       |
|                                           | <b>A scheduled follow-up visit/call</b> |             |                                 |       |
|                                           | <i>All patients</i>                     | 47.7%       | (40-55.6)                       |       |
|                                           | <i>COVID-19 suspected</i>               | 61.7%       | (51.6-70.9)                     |       |
|                                           | <b>Advice for family members</b>        |             |                                 |       |
| <i>All patients</i>                       | 64.5%                                   | (56.7-71.6) | <b>Home isolation</b>           |       |
| <i>COVID-19 suspected</i>                 | 72.3%                                   | (62.6-80.4) | <i>All patients</i>             | 51.0% |
|                                           |                                         |             | <i>COVID-19 suspected</i>       | 57.4% |
|                                           |                                         |             | <b>Social distancing</b>        |       |
|                                           |                                         |             | <i>All patients</i>             | 54.8% |
|                                           |                                         |             | <i>COVID-19 suspected</i>       | 61.7% |
| <b>Preventive measures for patient</b>    |                                         |             | <b>Extra handwashing</b>        |       |
| <i>All patients</i>                       | 80.6%                                   | (73.7-86.1) | <i>All patients</i>             | 74.2% |
| <i>COVID-19 suspected</i>                 | 84.0%                                   | (75.3-90.1) | <i>COVID-19 suspected</i>       | 80.9% |
|                                           |                                         |             | <b>Sneezing in sleeve</b>       |       |
|                                           |                                         |             | <i>All patients</i>             | 63.9% |
|                                           |                                         |             | <i>COVID-19 suspected</i>       | 73.4% |
|                                           |                                         |             | <b>Social distancing</b>        |       |
|                                           |                                         |             | <i>All patients</i>             | 76.8% |
|                                           |                                         |             | <i>COVID-19 suspected</i>       | 81.9% |
|                                           |                                         |             | <b>Nose/mouth protection</b>    |       |
|                                           |                                         |             | <i>All patients</i>             | 41.3% |
|                                           |                                         |             | <i>COVID-19 suspected</i>       | 44.7% |
|                                           |                                         |             | <b>Staying in separate room</b> |       |
|                                           |                                         |             | <i>All patients</i>             | 40.6% |
|                                           |                                         |             | <i>COVID-19 suspected</i>       | 56.4% |
| <b>Where to find reliable information</b> |                                         |             |                                 |       |
| <i>All patients</i>                       | 9.0%                                    | (5.5-14.6)  |                                 |       |
| <i>COVID-19 suspected</i>                 | 11.7%                                   | (6.7-19.7)  |                                 |       |
| <b>Georgia*</b>                           | <b>Advice for home isolation</b>        |             |                                 |       |
|                                           | <i>All patients</i>                     | 86.9%       | (81.9-90.7)                     |       |
|                                           | <i>COVID-19 suspected</i>               | 100%        |                                 |       |
|                                           | <b>Advice for symptomatic treatment</b> |             |                                 |       |
|                                           | <i>All patients</i>                     | 82.9%       | (77.4-87.3)                     |       |
|                                           | <i>COVID-19 suspected</i>               | 88.9%       |                                 |       |
|                                           | <b>A scheduled follow-up visit/call</b> |             |                                 |       |
|                                           | <i>All patients</i>                     | 49.5%       | (43-56.1)                       |       |
|                                           | <i>COVID-19 suspected</i>               | 55.6%       |                                 |       |
|                                           | <b>Advice for family members</b>        |             |                                 |       |
| <i>All patients</i>                       | 58.6%                                   | (52-64.8)   | <b>Home isolation</b>           |       |
| <i>COVID-19 suspected</i>                 | 88.9%                                   |             | <i>All patients</i>             | 7.7%  |
|                                           |                                         |             | <i>COVID-19 suspected</i>       | 22.2% |
|                                           |                                         |             | <b>Social distancing</b>        |       |
|                                           |                                         |             | <i>All patients</i>             | 54.5% |
|                                           |                                         |             | <i>COVID-19 suspected</i>       | 88.9% |
| <b>Preventive measures for patient</b>    |                                         |             | <b>Extra handwashing</b>        |       |
| <i>All patients</i>                       | 93.2%                                   | (89.2-95.9) | <i>All patients</i>             | 73.9% |
|                                           |                                         |             | <i>COVID-19 suspected</i>       | 66.7% |

|  |                                                                                               |                          |                                                                                     |                            |
|--|-----------------------------------------------------------------------------------------------|--------------------------|-------------------------------------------------------------------------------------|----------------------------|
|  | <i>COVID-19 suspected</i>                                                                     | 100%                     | <b>Sneezing in sleeve</b><br><i>All patients</i><br><i>COVID-19 suspected</i>       | 73.0% (66.8-78.4)<br>55.6% |
|  |                                                                                               |                          | <b>Social distancing</b><br><i>All patients</i><br><i>COVID-19 suspected</i>        | 89.6% (84.9-93)<br>88.9%   |
|  |                                                                                               |                          | <b>Nose/mouth protection</b><br><i>All patients</i><br><i>COVID-19 suspected</i>    | 72.5% (66.3-78)<br>66.7%   |
|  |                                                                                               |                          | <b>Staying in separate room</b><br><i>All patients</i><br><i>COVID-19 suspected</i> | 10.8% (7.4-15.6)<br>55.6%  |
|  | <b>Where to find reliable information</b><br><i>All patients</i><br><i>COVID-19 suspected</i> | 11.3% (7.8-16.1)<br>0.0% |                                                                                     |                            |

|               |                                                                                                       |                                              |                                                                                     |                                        |
|---------------|-------------------------------------------------------------------------------------------------------|----------------------------------------------|-------------------------------------------------------------------------------------|----------------------------------------|
| <b>Greece</b> | <b>Advice for home isolation</b><br><i>All patients</i><br><i>COVID-19 suspected</i>                  | 75.6% (69.5-80.8)<br>83.1% (73.7-89.7)       |                                                                                     |                                        |
|               | <b>Advice for symptomatic treatment</b><br><i>All patients</i><br><i>COVID-19 suspected</i>           | 63.8% (57.3-70)<br>50.6% (40.1-61.1)         |                                                                                     |                                        |
|               | <b>A scheduled follow-up visit/call</b><br><i>All patients</i><br><i>COVID-19 suspected</i>           | 71.0% (64.7-76.6)<br>77.1% (67-84.8)         |                                                                                     |                                        |
|               | <b>Advice for family members</b><br><i>All patients</i><br><br><i>COVID-19 suspected</i>              | 73.3%<br>(67.1-78.7)<br>96.4%<br>(89.8-98.7) | <b>Home isolation</b><br><i>All patients</i><br><i>COVID-19 suspected</i>           | 51.0% (44.6-57.6)<br>74.7% (64.4-82.8) |
|               |                                                                                                       |                                              | <b>Social distancing</b><br><i>All patients</i><br><i>COVID-19 suspected</i>        | 62.4% (55.9-68.6)<br>94.0% (86.7-97.4) |
|               | <b>Preventive measures for patient</b><br><i>PPAS COVID</i><br><br><i>COVID-19 suspected patients</i> | 82.4%<br>(76.8-86.8)<br>92.8%<br>(85.1-96.6) | <b>Extra handwashing</b><br><i>All patients</i><br><i>COVID-19 suspected</i>        | 72.9% (66.6-78.3)<br>91.6% (83.6-95.8) |
|               |                                                                                                       |                                              | <b>Sneezing in sleeve</b><br><i>All patients</i><br><i>COVID-19 suspected</i>       | 71.9% (65.7-77.5)<br>91.6% (83.6-95.8) |
|               |                                                                                                       |                                              | <b>Social distancing</b><br><i>All patients</i><br><i>COVID-19 suspected</i>        | 71.0% (64.7-76.6)<br>91.6% (83.6-95.8) |
|               |                                                                                                       |                                              | <b>Nose/mouth protection</b><br><i>All patients</i><br><i>COVID-19 suspected</i>    | 63.3% (56.8-69.4)<br>89.2% (80.7-94.2) |
|               |                                                                                                       |                                              | <b>Staying in separate room</b><br><i>All patients</i><br><i>COVID-19 suspected</i> | 48.0% (41.5-54.5)<br>75.9% (65.7-83.8) |
|               | <b>Where to find reliable information</b><br><i>All patients</i><br><i>COVID-19 suspected</i>         | 0.0% (0-1.7)<br>0.0% (0-4.4)                 |                                                                                     |                                        |

|                                           |                                         |                                 |                           |                   |
|-------------------------------------------|-----------------------------------------|---------------------------------|---------------------------|-------------------|
| <b>Hungary*</b>                           | <b>Advice for home isolation</b>        |                                 |                           |                   |
|                                           | <i>All patients</i>                     |                                 | 45.7% (37.6-54)           |                   |
|                                           | <i>COVID-19 suspected</i>               |                                 | 83.3%                     |                   |
|                                           | <b>Advice for symptomatic treatment</b> |                                 |                           |                   |
|                                           | <i>All patients</i>                     |                                 | 55.1% (46.8-63.1)         |                   |
|                                           | <i>COVID-19 suspected</i>               |                                 | 33.3%                     |                   |
|                                           | <b>A scheduled follow-up visit/call</b> |                                 |                           |                   |
|                                           | <i>All patients</i>                     |                                 | 39.1% (31.4-47.5)         |                   |
|                                           | <i>COVID-19 suspected</i>               |                                 | 0.0%                      |                   |
|                                           | <b>Advice for family members</b>        |                                 |                           |                   |
| <i>All patients</i>                       | 42.8%<br>(34.8-51.1)                    | <b>Home isolation</b>           | <i>All patients</i>       | 32.6% (25.4-40.8) |
| <i>COVID-19 suspected</i>                 | 83.3%                                   | <i>COVID-19 suspected</i>       | <i>COVID-19 suspected</i> | 66.7%             |
|                                           |                                         | <b>Social distancing</b>        | <i>All patients</i>       | 35.5% (28-43.8)   |
|                                           |                                         | <i>COVID-19 suspected</i>       | <i>COVID-19 suspected</i> | 55.6%             |
| <b>Preventive measures for patient</b>    |                                         | <b>Extra handwashing</b>        | <i>All patients</i>       | 58.0% (49.6-65.9) |
| <i>All patients</i>                       | 61.6%<br>(53.3-69.3)                    | <i>COVID-19 suspected</i>       | <i>COVID-19 suspected</i> | 88.9%             |
| <i>COVID-19 suspected</i>                 | 100%                                    | <b>Sneezing in sleeve</b>       | <i>All patients</i>       | 48.6% (40.4-56.8) |
|                                           |                                         | <i>COVID-19 suspected</i>       | <i>COVID-19 suspected</i> | 77.8%             |
|                                           |                                         | <b>Social distancing</b>        | <i>All patients</i>       | 25.4% (18.8-33.2) |
|                                           |                                         | <i>COVID-19 suspected</i>       | <i>COVID-19 suspected</i> | 72.2%             |
|                                           |                                         | <b>Nose/mouth protection</b>    | <i>All patients</i>       | 25.4% (18.8-33.2) |
|                                           |                                         | <i>COVID-19 suspected</i>       | <i>COVID-19 suspected</i> | 66.7%             |
|                                           |                                         | <b>Staying in separate room</b> | <i>All patients</i>       | 11.6% (7.3-18)    |
|                                           |                                         | <i>COVID-19 suspected</i>       | <i>COVID-19 suspected</i> | 55.6%             |
| <b>Where to find reliable information</b> |                                         |                                 |                           |                   |
| <i>All patients</i>                       |                                         | 0.0% (0-2.7)                    |                           |                   |
| <i>COVID-19 suspected</i>                 |                                         | 0.0%                            |                           |                   |
| <b>Ireland</b>                            | <b>Advice for home isolation</b>        |                                 |                           |                   |
|                                           | <i>All patients</i>                     |                                 | 76.5% (70.4-81.7)         |                   |
|                                           | <i>COVID-19 suspected</i>               |                                 | 91.7% (83.8-95.9)         |                   |
|                                           | <b>Advice for symptomatic treatment</b> |                                 |                           |                   |
|                                           | <i>All patients</i>                     |                                 | 85.7% (80.4-89.8)         |                   |
|                                           | <i>COVID-19 suspected</i>               |                                 | 86.9% (78.1-92.5)         |                   |
|                                           | <b>A scheduled follow-up visit/call</b> |                                 |                           |                   |
|                                           | <i>All patients</i>                     |                                 | 10.6% (7.2-15.4)          |                   |
|                                           | <i>COVID-19 suspected</i>               |                                 | 14.3% (8.4-23.3)          |                   |
|                                           | <b>Advice for family members</b>        |                                 |                           |                   |
| <i>All patients</i>                       | 65.9%<br>(59.4-71.9)                    | <b>Home isolation</b>           | <i>All patients</i>       | 52.5% (45.9-59.1) |
| <i>COVID-19 suspected</i>                 | 81.0%<br>(71.3-87.9)                    | <i>COVID-19 suspected</i>       | <i>COVID-19 suspected</i> | 70.2% (59.8-79)   |
|                                           |                                         | <b>Social distancing</b>        | <i>All patients</i>       | 44.7% (38.2-51.4) |
|                                           |                                         | <i>COVID-19 suspected</i>       | <i>COVID-19 suspected</i> | 57.1% (46.5-67.2) |
| <b>Preventive measures for patient</b>    |                                         | <b>Extra handwashing</b>        | <i>All patients</i>       | 58.1% (51.4-64.4) |
| <i>All patients</i>                       | 67.7%<br>(61.3-73.6)                    | <i>COVID-19 suspected</i>       | <i>COVID-19 suspected</i> | 75.0% (64.8-83)   |

|  |                                                                                               |                                      |                                                                                     |                                        |
|--|-----------------------------------------------------------------------------------------------|--------------------------------------|-------------------------------------------------------------------------------------|----------------------------------------|
|  | <i>COVID-19 suspected</i>                                                                     | 88.1%<br>(79.5-93.4)                 | <b>Sneezing in sleeve</b><br><i>All patients</i><br><i>COVID-19 suspected</i>       | 46.5% (40-53.2)<br>60.7% (50-70.5)     |
|  |                                                                                               |                                      | <b>Social distancing</b><br><i>All patients</i><br><i>COVID-19 suspected</i>        | 56.2% (49.6-62.7)<br>73.8% (63.5-82)   |
|  |                                                                                               |                                      | <b>Nose/mouth protection</b><br><i>All patients</i><br><i>COVID-19 suspected</i>    | 41.9% (35.6-48.6)<br>54.8% (44.1-65)   |
|  |                                                                                               |                                      | <b>Staying in separate room</b><br><i>All patients</i><br><i>COVID-19 suspected</i> | 43.8% (37.3-50.4)<br>58.3% (47.7-68.3) |
|  | <b>Where to find reliable information</b><br><i>All patients</i><br><i>COVID-19 suspected</i> | 54.8% (48.2-61.3)<br>73.8% (63.5-82) |                                                                                     |                                        |

|                |                                                                                                |                                        |                                                                                     |                                        |
|----------------|------------------------------------------------------------------------------------------------|----------------------------------------|-------------------------------------------------------------------------------------|----------------------------------------|
| <b>Moldova</b> | <b>Advice for home isolation</b><br><i>All patients</i><br><i>COVID-19 suspected</i>           | 77.3% (71.6-82.2)<br>75.0% (67.2-81.4) |                                                                                     |                                        |
|                | <b>Advice for symptomatic treatment</b><br><i>All patients</i><br><i>COVID-19 suspected</i>    | 88.2% (83.5-91.7)<br>80.7% (73.4-86.4) |                                                                                     |                                        |
|                | <b>A scheduled follow-up visit/call</b><br><i>All patients</i><br><i>COVID-19 suspected</i>    | 82.4% (77-86.7)<br>73.6% (65.7-80.2)   |                                                                                     |                                        |
|                | <b>Advice for family members</b><br><i>All patients</i><br><br><i>COVID-19 suspected</i>       | 84.0%<br>(78.8-88.1)                   | <b>Home isolation</b><br><i>All patients</i><br><i>COVID-19 suspected</i>           | 49.2% (42.9-55.5)<br>79.3% (71.8-85.2) |
|                |                                                                                                | 98.6%<br>(94.9-99.6)                   | <b>Social distancing</b><br><i>All patients</i><br><i>COVID-19 suspected</i>        | 81.9% (76.6-86.3)<br>95.7% (91-98)     |
|                | <b>Preventive measures for patient</b><br><i>All patients</i><br><br><i>COVID-19 suspected</i> | 95.8%<br>(92.4-97.7)                   | <b>Extra handwashing</b><br><i>All patients</i><br><i>COVID-19 suspected</i>        | 95.4% (91.9-97.4)<br>94.3% (89.1-97)   |
|                |                                                                                                | 95.0%<br>(90-97.6)                     | <b>Sneezing in sleeve</b><br><i>All patients</i><br><i>COVID-19 suspected</i>       | 95.4% (91.9-97.4)<br>94.3% (89.1-97)   |
|                |                                                                                                |                                        | <b>Social distancing</b><br><i>All patients</i><br><i>COVID-19 suspected</i>        | 95.0% (91.4-97.1)<br>93.6% (88.2-96.6) |
|                |                                                                                                |                                        | <b>Nose/mouth protection</b><br><i>All patients</i><br><i>COVID-19 suspected</i>    | 94.5% (90.9-96.8)<br>93.6% (88.2-96.6) |
|                |                                                                                                |                                        | <b>Staying in separate room</b><br><i>All patients</i><br><i>COVID-19 suspected</i> | 55.0% (48.7-61.2)<br>63.6% (55.3-71.1) |
|                | <b>Where to find reliable information</b><br><i>All patients</i><br><i>COVID-19 suspected</i>  | 52.9% (46.6-59.2)<br>75.0% (67.2-81.4) |                                                                                     |                                        |



|                                           |                                         |                     |                                 |                           |
|-------------------------------------------|-----------------------------------------|---------------------|---------------------------------|---------------------------|
| Netherlands                               | <b>Advice for home isolation</b>        |                     |                                 |                           |
|                                           | <i>All patients</i>                     | 71.3%               | (65.2-76.8)                     |                           |
|                                           | <i>COVID-19 suspected</i>               | 81.5%               | (74.1-87.1)                     |                           |
|                                           | <b>Advice for symptomatic treatment</b> |                     |                                 |                           |
|                                           | <i>All patients</i>                     | 49.1%               | (42.7-55.6)                     |                           |
|                                           | <i>COVID-19 suspected</i>               | 45.2%               | (37-53.6)                       |                           |
|                                           | <b>A scheduled follow-up visit/call</b> |                     |                                 |                           |
|                                           | <i>All patients</i>                     | 26.1%               | (20.8-32.1)                     |                           |
|                                           | <i>COVID-19 suspected</i>               | 34.8%               | (27.3-43.2)                     |                           |
|                                           | <b>Advice for family members</b>        | <i>All patients</i> | 54.8%                           | (48.3-61.1)               |
| <i>COVID-19 suspected</i>                 |                                         | 63.0%               | (54.6-70.6)                     | <i>All patients</i>       |
|                                           |                                         |                     |                                 | <i>COVID-19 suspected</i> |
|                                           |                                         |                     |                                 | <b>Social distancing</b>  |
|                                           |                                         |                     |                                 | <i>All patients</i>       |
|                                           |                                         |                     |                                 | <i>COVID-19 suspected</i> |
| <b>Preventive measures for patient</b>    | <i>All patients</i>                     | 56.1%               | (49.6-62.3)                     | <b>Extra handwashing</b>  |
|                                           | <i>COVID-19 suspected</i>               | 56.3%               | (47.9-64.4)                     | <i>All patients</i>       |
|                                           |                                         |                     |                                 | <i>COVID-19 suspected</i> |
|                                           |                                         |                     |                                 | <b>Sneezing in sleeve</b> |
|                                           |                                         |                     |                                 | <i>All patients</i>       |
|                                           |                                         |                     |                                 | <i>COVID-19 suspected</i> |
|                                           |                                         |                     |                                 | <b>Social distancing</b>  |
|                                           |                                         |                     |                                 | <i>All patients</i>       |
|                                           |                                         |                     | <i>COVID-19 suspected</i>       |                           |
|                                           |                                         |                     | <b>Nose/mouth protection</b>    |                           |
|                                           |                                         |                     | <i>All patients</i>             |                           |
|                                           |                                         |                     | <i>COVID-19 suspected</i>       |                           |
|                                           |                                         |                     | <b>Staying in separate room</b> |                           |
|                                           |                                         |                     | <i>All patients</i>             |                           |
|                                           |                                         |                     | <i>COVID-19 suspected</i>       |                           |
| <b>Where to find reliable information</b> | <i>All patients</i>                     | 24.8%               | (19.7-30.7)                     |                           |
|                                           | <i>COVID-19 suspected</i>               | 25.9%               | (19.2-33.9)                     |                           |
| Poland*                                   | <b>Advice for home isolation</b>        |                     |                                 |                           |
|                                           | <i>All patients</i>                     | 57.4%               | (50.9-63.6)                     |                           |
|                                           | <i>COVID-19 suspected</i>               | 61.5%               |                                 |                           |
|                                           | <b>Advice for symptomatic treatment</b> |                     |                                 |                           |
|                                           | <i>All patients</i>                     | 73.9%               | (67.9-79.2)                     |                           |
|                                           | <i>COVID-19 suspected</i>               | 69.2%               |                                 |                           |
|                                           | <b>A scheduled follow-up visit/call</b> |                     |                                 |                           |
|                                           | <i>All patients</i>                     | 54.3%               | (47.9-60.6)                     |                           |
|                                           | <i>COVID-19 suspected</i>               | 69.2%               |                                 |                           |
|                                           | <b>Advice for family members</b>        | <i>All patients</i> | 25.2%                           | (20-31.2)                 |
| <i>COVID-19 suspected</i>                 |                                         | 84.6%               | (49.6-62.3)                     | <i>All patients</i>       |
|                                           |                                         |                     |                                 | <i>COVID-19 suspected</i> |
|                                           |                                         |                     |                                 | <b>Social distancing</b>  |
|                                           |                                         |                     |                                 | <i>All patients</i>       |
|                                           |                                         |                     |                                 | <i>COVID-19 suspected</i> |
| <b>Preventive measures for patient</b>    | <i>All patients</i>                     | 56.1%               | (49.6-62.3)                     | <b>Extra handwashing</b>  |
|                                           |                                         |                     |                                 | <i>All patients</i>       |
|                                           |                                         |                     |                                 | <i>COVID-19 suspected</i> |

|  |                                                                                               |                            |                                                                                     |                            |
|--|-----------------------------------------------------------------------------------------------|----------------------------|-------------------------------------------------------------------------------------|----------------------------|
|  | <i>COVID-19 suspected</i>                                                                     | 84.6%                      | <b>Sneezing in sleeve</b><br><i>All patients</i><br><i>COVID-19 suspected</i>       | 43.0% (36.8-49.5)<br>76.9% |
|  |                                                                                               |                            | <b>Social distancing</b><br><i>All patients</i><br><i>COVID-19 suspected</i>        | 31.7% (26.1-38)<br>76.9%   |
|  |                                                                                               |                            | <b>Nose/mouth protection</b><br><i>All patients</i><br><i>COVID-19 suspected</i>    | 13.5% (9.7-18.5)<br>84.6%  |
|  |                                                                                               |                            | <b>Staying in separate room</b><br><i>All patients</i><br><i>COVID-19 suspected</i> | 7.8% (5-12)<br>38.5%       |
|  | <b>Where to find reliable information</b><br><i>All patients</i><br><i>COVID-19 suspected</i> | 30.4% (24.9-36.7)<br>53.8% |                                                                                     |                            |

|                 |                                                                                                |                              |                                                                                     |                            |
|-----------------|------------------------------------------------------------------------------------------------|------------------------------|-------------------------------------------------------------------------------------|----------------------------|
| <b>Romania*</b> | <b>Advice for home isolation</b><br><i>All patients</i><br><i>COVID-19 suspected</i>           | 32.5% (24.6-41.5)<br>75.0%   |                                                                                     |                            |
|                 | <b>Advice for symptomatic treatment</b><br><i>All patients</i><br><i>COVID-19 suspected</i>    | 94.7% (89-97.6)<br>87.5%     |                                                                                     |                            |
|                 | <b>A scheduled follow-up visit/call</b><br><i>All patients</i><br><i>COVID-19 suspected</i>    | 41.2% (32.6-50.4)<br>87.5%   |                                                                                     |                            |
|                 | <b>Advice for family members</b><br><i>All patients</i><br><br><i>COVID-19 suspected</i>       | 35.1%<br>(27-44.2)<br>87.5%  | <b>Home isolation</b><br><i>All patients</i><br><i>COVID-19 suspected</i>           | 3.5% (1.4-8.7)<br>37.5%    |
|                 |                                                                                                |                              | <b>Social distancing</b><br><i>All patients</i><br><i>COVID-19 suspected</i>        | 34.2% (26.1-43.3)<br>87.5% |
|                 | <b>Preventive measures for patient</b><br><i>All patients</i><br><br><i>COVID-19 suspected</i> | 68.4%<br>(59.4-76.2)<br>100% | <b>Extra handwashing</b><br><i>All patients</i><br><i>COVID-19 suspected</i>        | 68.4% (59.4-76.2)<br>100%  |
|                 |                                                                                                |                              | <b>Sneezing in sleeve</b><br><i>All patients</i><br><i>COVID-19 suspected</i>       | 64.9% (55.8-73)<br>87.5%   |
|                 |                                                                                                |                              | <b>Social distancing</b><br><i>All patients</i><br><i>COVID-19 suspected</i>        | 60.5% (51.4-69)<br>100%    |
|                 |                                                                                                |                              | <b>Nose/mouth protection</b><br><i>All patients</i><br><i>COVID-19 suspected</i>    | 57.9% (48.7-66.6)<br>100%  |
|                 |                                                                                                |                              | <b>Staying in separate room</b><br><i>All patients</i><br><i>COVID-19 suspected</i> | 29.8% (22.2-38.8)<br>87.5% |
|                 | <b>Where to find reliable information</b><br><i>All patients</i><br><i>COVID-19 suspected</i>  | 4.4% (1.9-9.8)<br>37.5%      |                                                                                     |                            |

|                                           |                                         |             |                                 |       |
|-------------------------------------------|-----------------------------------------|-------------|---------------------------------|-------|
| <b>Ukraine</b>                            | <b>Advice for home isolation</b>        |             |                                 |       |
|                                           | <i>All patients</i>                     | 61.8%       | (55.4-67.9)                     |       |
|                                           | <i>COVID-19 suspected</i>               | 85.3%       | (75-91.8)                       |       |
|                                           | <b>Advice for symptomatic treatment</b> |             |                                 |       |
|                                           | <i>All patients</i>                     | 83.3%       | (78-87.6)                       |       |
|                                           | <i>COVID-19 suspected</i>               | 64.7%       | (52.8-75)                       |       |
|                                           | <b>A scheduled follow-up visit/call</b> |             |                                 |       |
|                                           | <i>All patients</i>                     | 64.5%       | (58.1-70.4)                     |       |
|                                           | <i>COVID-19 suspected</i>               | 64.7%       | (52.8-75)                       |       |
|                                           | <b>Advice for family members</b>        |             |                                 |       |
| <i>All patients</i>                       | 54.4%                                   | (47.9-60.7) | <b>Home isolation</b>           |       |
| <i>COVID-19 suspected</i>                 | 88.2%                                   | (78.5-93.9) | <i>All patients</i>             | 39.9% |
|                                           |                                         |             | <i>COVID-19 suspected</i>       | 83.8% |
|                                           |                                         |             | <b>Social distancing</b>        |       |
|                                           |                                         |             | <i>All patients</i>             | 45.6% |
|                                           |                                         |             | <i>COVID-19 suspected</i>       | 70.6% |
| <b>Preventive measures for patient</b>    |                                         |             | <b>Extra handwashing</b>        |       |
| <i>All patients</i>                       | 64.9%                                   | (58.5-70.8) | <i>All patients</i>             | 57.0% |
| <i>COVID-19 suspected</i>                 | 76.5%                                   | (65.1-85)   | <i>COVID-19 suspected</i>       | 69.1% |
|                                           |                                         |             | <b>Sneezing in sleeve</b>       |       |
|                                           |                                         |             | <i>All patients</i>             | 50.4% |
|                                           |                                         |             | <i>COVID-19 suspected</i>       | 61.8% |
|                                           |                                         |             | <b>Social distancing</b>        |       |
|                                           |                                         |             | <i>All patients</i>             | 52.2% |
|                                           |                                         |             | <i>COVID-19 suspected</i>       | 66.2% |
|                                           |                                         |             | <b>Nose/mouth protection</b>    |       |
|                                           |                                         |             | <i>All patients</i>             | 51.3% |
|                                           |                                         |             | <i>COVID-19 suspected</i>       | 66.2% |
|                                           |                                         |             | <b>Staying in separate room</b> |       |
|                                           |                                         |             | <i>All patients</i>             | 50.4% |
|                                           |                                         |             | <i>COVID-19 suspected</i>       | 67.6% |
| <b>Where to find reliable information</b> |                                         |             |                                 |       |
| <i>All patients</i>                       | 28.9%                                   | (23.5-35.1) |                                 |       |
| <i>COVID-19 suspected</i>                 | 58.8%                                   | (47-69.7)   |                                 |       |
| <b>United Kingdom</b>                     | <b>Advice for home isolation</b>        |             |                                 |       |
|                                           | <i>All patients</i>                     | 50.0%       | (41.2-58.8)                     |       |
|                                           | <i>COVID-19 suspected</i>               | 66.7%       | (54.1-77.3)                     |       |
|                                           | <b>Advice for symptomatic treatment</b> |             |                                 |       |
|                                           | <i>All patients</i>                     | 66.7%       | (57.8-74.5)                     |       |
|                                           | <i>COVID-19 suspected</i>               | 68.3%       | (55.8-78.7)                     |       |
|                                           | <b>A scheduled follow-up visit/call</b> |             |                                 |       |
|                                           | <i>All patients</i>                     | 15.8%       | (10.4-23.4)                     |       |
|                                           | <i>COVID-19 suspected</i>               | 21.7%       | (13.1-33.6)                     |       |
|                                           | <b>Advice for family members</b>        |             |                                 |       |
| <i>All patients</i>                       | 40.0%                                   | (31.7-48.9) | <b>Home isolation</b>           |       |
| <i>COVID-19 suspected</i>                 | 51.7%                                   | (39.3-63.8) | <i>All patients</i>             | 31.7% |
|                                           |                                         |             | <i>COVID-19 suspected</i>       | 40.0% |
|                                           |                                         |             | <b>Social distancing</b>        |       |
|                                           |                                         |             | <i>All patients</i>             | 14.2% |
|                                           |                                         |             | <i>COVID-19 suspected</i>       | 25.0% |
| <b>Preventive measures for patient</b>    |                                         |             | <b>Extra handwashing</b>        |       |
| <i>All patients</i>                       | 28.3%                                   | (21-37)     | <i>All patients</i>             | 20.0% |
|                                           |                                         |             | <i>COVID-19 suspected</i>       | 23.3% |

|  |                                                                                               |                                    |                                                                                     |                                        |
|--|-----------------------------------------------------------------------------------------------|------------------------------------|-------------------------------------------------------------------------------------|----------------------------------------|
|  | <i>COVID-19 suspected</i>                                                                     | 31.7%<br>(21.3-44.2)               | <b>Sneezing in sleeve</b><br><i>All patients</i><br><i>COVID-19 suspected</i>       | 5.8% (2.9-11.5)<br>5.0% (1.7-13.7)     |
|  |                                                                                               |                                    | <b>Social distancing</b><br><i>All patients</i><br><i>COVID-19 suspected</i>        | 15.8% (10.4-23.4)<br>23.3% (14.4-35.4) |
|  |                                                                                               |                                    | <b>Nose/mouth protection</b><br><i>All patients</i><br><i>COVID-19 suspected</i>    | 5.0% (2.3-10.5)<br>8.3% (3.6-18)       |
|  |                                                                                               |                                    | <b>Staying in separate room</b><br><i>All patients</i><br><i>COVID-19 suspected</i> | 8.3% (4.6-14.7)<br>11.7% (5.8-22.2)    |
|  | <b>Where to find reliable information</b><br><i>All patients</i><br><i>COVID-19 suspected</i> | 12.5% (7.7-19.6)<br>10% (4.7-20.1) |                                                                                     |                                        |

\* For countries with less than 20 COVID-19 suspected patients, 95% CIs were not calculated and data should be interpreted with care.
